# Supplementary material for: Potassium phosphate–ionic liquid mediated selective mono-Michael addition
Source: Royal Society of Chemistry journal article supplement (doi:10.1039/c5nj01225b), 2015-01-01

Supplementary Information for

### Potassium Phosphate-Ionic Liquid mediated selective *mono*-Michael addition

Anand D Sawant,<sup>a</sup> Surybala D Jagadale,<sup>b</sup> Uday V. Desai<sup>b</sup> and Manikrao M. Salunkhe<sup>b,c,\*</sup>

<sup>a</sup> Department of Chemistry, Sou. Sushila Danchand Ghodawat Charitable Trust's Group of Institutions, Atigre, Kolhapur, India-416118

<sup>b</sup> Department of Chemistry, Shivaji University, Vidhyanagar, Kolhapur, India-416004

<sup>c</sup>YCMOU, Nashik, India.

\*E-mail: [mmsalunkhe@hotmail.com](mailto:mmsalunkhe@hotmail.com)

**Instrumental Details:** All NMRs were recorded on Bruker 300 AVANCE III with CDCl<sub>3</sub> as solvent and TMS as internal standard. GC analysis was carried out on Shimadzu GC solution-2010 coupled with MS. ESI-MS analysis was carried out on Bruker microTOF-Q.

Characterization of ionic liquid [bmIm]Cl:

**<sup>1</sup>H NMR, ESI-MS (+ve mode):**

**A)**

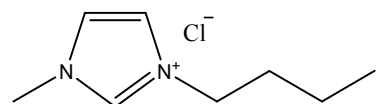

**<sup>1</sup>H NMR (300 MHz, CDCl<sub>3</sub>)**  $\delta$  0.93 (t, 3H), 1.31 (m, 2H, CH<sub>2</sub>CH<sub>3</sub>), 1.84 (m, 2H), 2.30 (t, 2H), 4.09 (s, 1H, CH<sub>3</sub>), 4.30 (t, 2H, CH<sub>2</sub>CH<sub>2</sub>), 7.37 (d, 1H, ArH), 7.50 (d, 1H, Ar H), 10.62 (s, 1H, ArH); **ESI-MS (+ve mode)** 139.1.

**<sup>1</sup>H NMR and <sup>13</sup>CNMR spectra of products of Michael addition reaction:**

**B)**

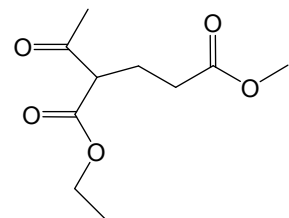

**<sup>1</sup>H NMR (300 MHz, CDCl<sub>3</sub>)**  $\delta$  1.20 (t, 3H), 2.08 (s, 3H, COCH<sub>3</sub>), 2.09-2.12 (m, 2H), 2.30 (t, 2H), 3.49 (t, 1H, CH), 3.59 (s, 3H, OCH<sub>3</sub>), 4.12 (q, 2H); **<sup>13</sup>C NMR (75 MHz, CDCl<sub>3</sub>)**  $\delta$  13.60, 22.80, 26.47, 29.06, 51.62, 58.19, 61.68, 171.36, 172.86, 204.13 ppm; **MS (EI) m/z** - 216(unstable), 185, 142, 114, 100, 85; **Anal Calc:** C 55.55, H 7.46; **Found:** C 55.32, H 7.38.

C)

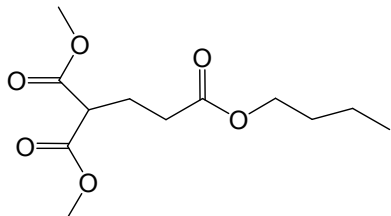

**<sup>1</sup>H NMR (300 MHz, CDCl<sub>3</sub>)** δ 0.94 (t, 3H), 1.31-1.43 (m, 2H), 1.54-1.65 (m, 2H), 2.22 (t, 2H), 2.35-2.42 (m, 2H), 3.48 (t, 1H, CH), 3.75 (s, 6H, 2OCH<sub>3</sub>); **<sup>13</sup>C NMR (75 MHz, CDCl<sub>3</sub>)** δ 13.64, 19.06, 23.80, 30.57, 31.42, 50.44, 52.49, 64.47, 166.89, 169.32, 172.39; **MS (EI) m/z** 310; **Anal Calc:** C 55.37, H 7.74; **Found:** C 55.22, H 7.58.

D)

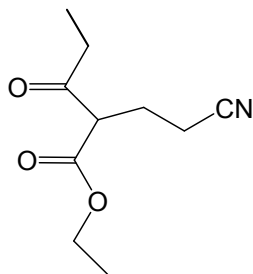

**<sup>1</sup>H NMR (300 MHz, CDCl<sub>3</sub>)** δ 1.05 (t, 3H, CH<sub>3</sub> CH<sub>2</sub>), 1.24 (t, 3H, CH<sub>3</sub> CH<sub>2</sub>O), 2.11-2.21 (m, 2H, CH<sub>2</sub>CH), 2.41 (t, 2H, CH<sub>2</sub>CN), 2.53 (q, 2H, CH<sub>2</sub>CH<sub>3</sub>), 3.66 (t, 1H, CH), 4.14 (q, 2H, OCH<sub>2</sub>); **<sup>13</sup>C NMR (75 MHz, CDCl<sub>3</sub>)** δ 7.56, 14.06, 15.07, 23.42, 36.27, 56.28, 61.31, 118.69, 168.45, 204.32; **MS (EI) m/z** 197, 154, 108; **Anal Calc:** C 60.90, H 7.67; **Found:** C 60.61, H 7.45.

E)

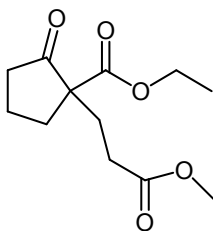

**<sup>1</sup>H NMR (300 MHz, CDCl<sub>3</sub>)** δ 1.21 (t, 3H, CH<sub>3</sub>), 1.82-2.00 (m, 4H), 2.12-2.36 (m, 4H), 2.41-2.49 (m, 2H), 3.63 (s, 3H, OCH<sub>3</sub>), 4.09 (q, 2H, CH<sub>2</sub>CH<sub>3</sub>); **<sup>13</sup>C NMR (75 MHz, CDCl<sub>3</sub>)** δ 14.01, 19.51, 28.35, 29.54, 33.61, 37.80, 51.61, 59.17, 61.45, 170.90, 173.36, 214.30; **MS (EI) m/z** 242 ; **Anal Calc:** C 59.49, H 7.49; **Found:** C 59.22, H 7.38.

A)

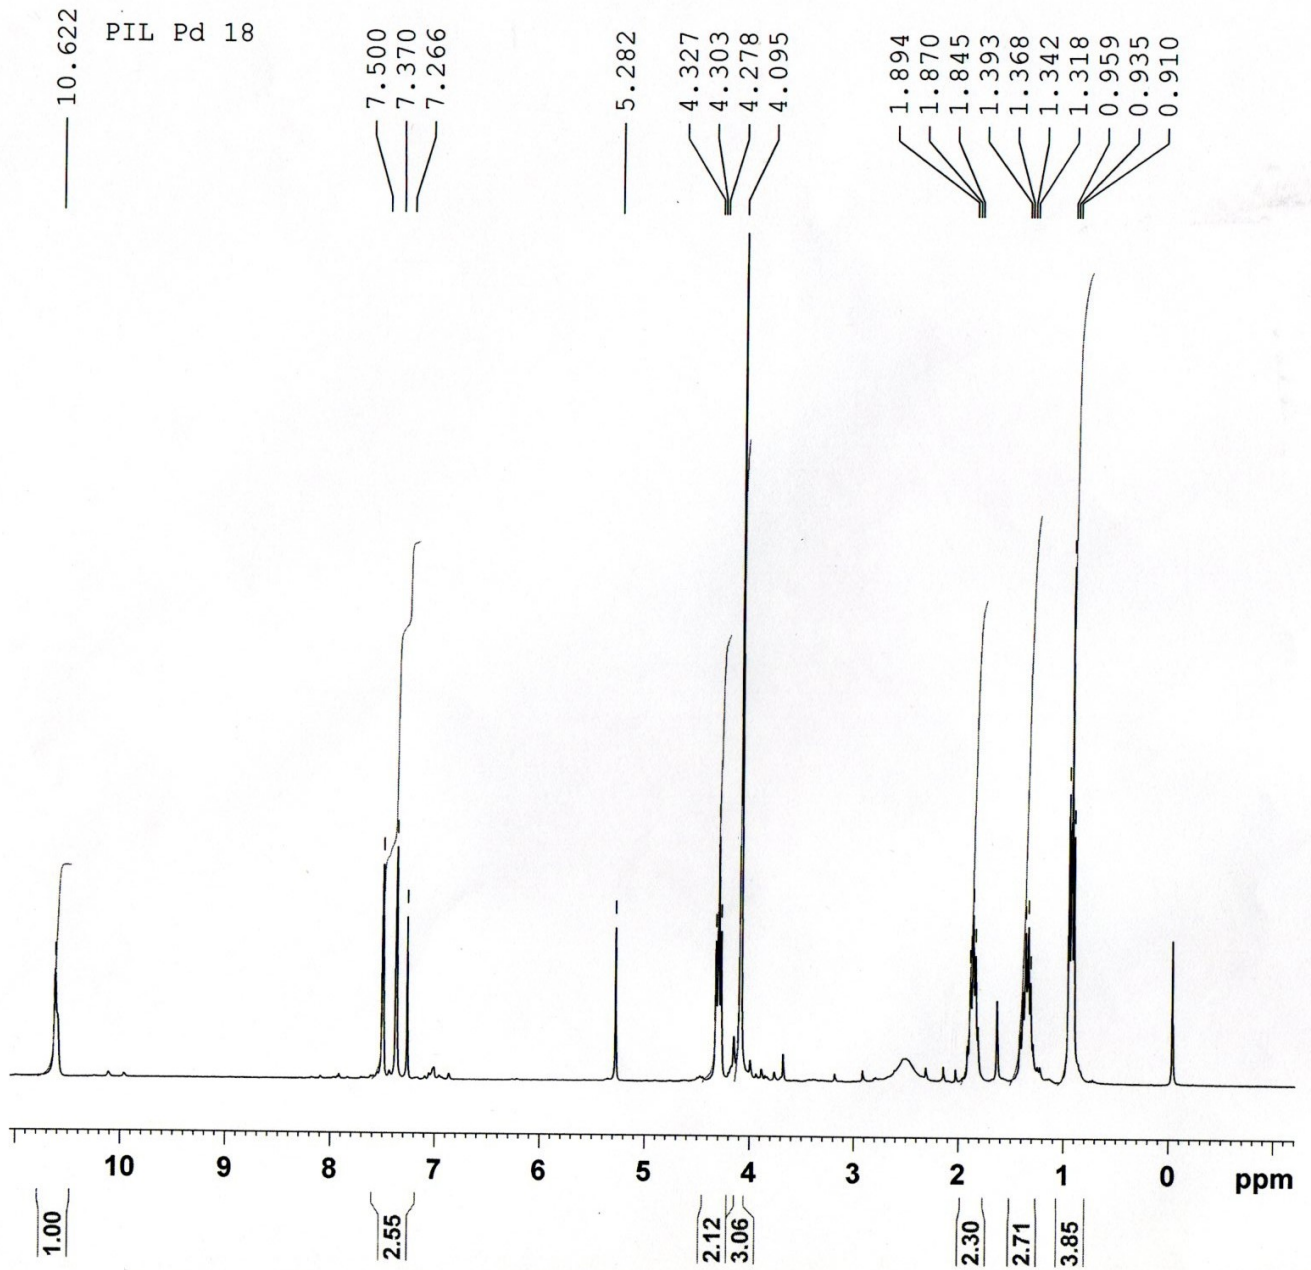

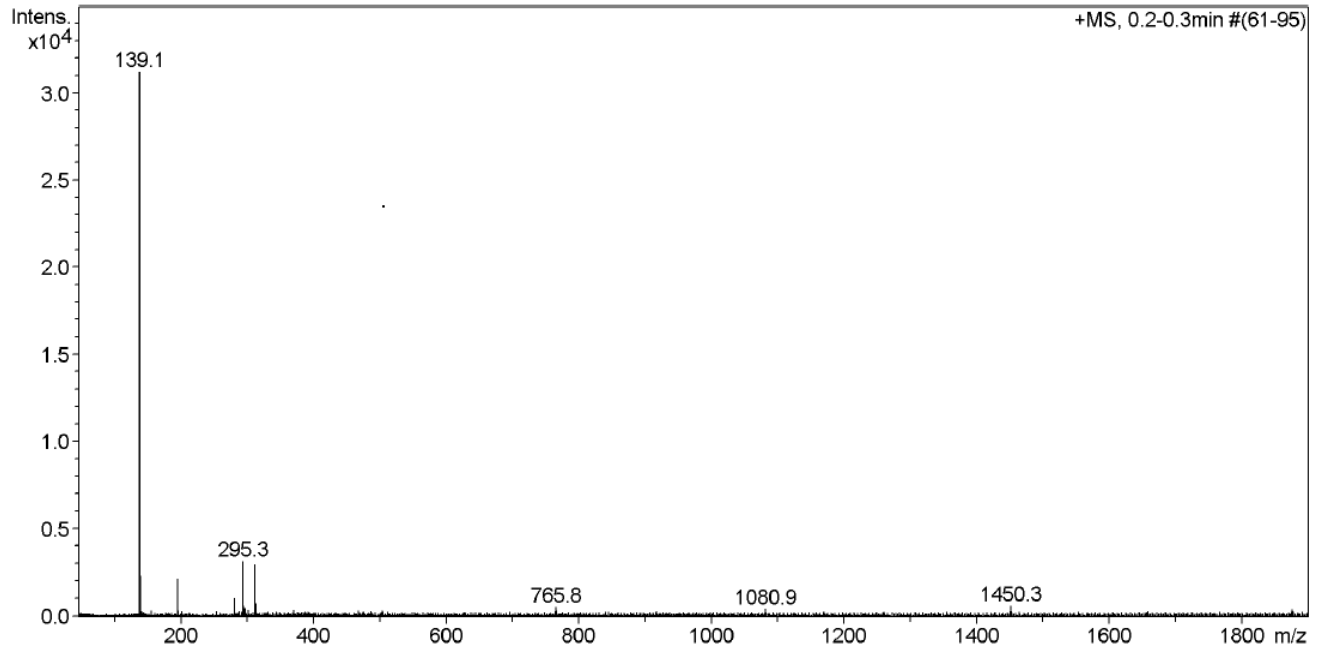

B)

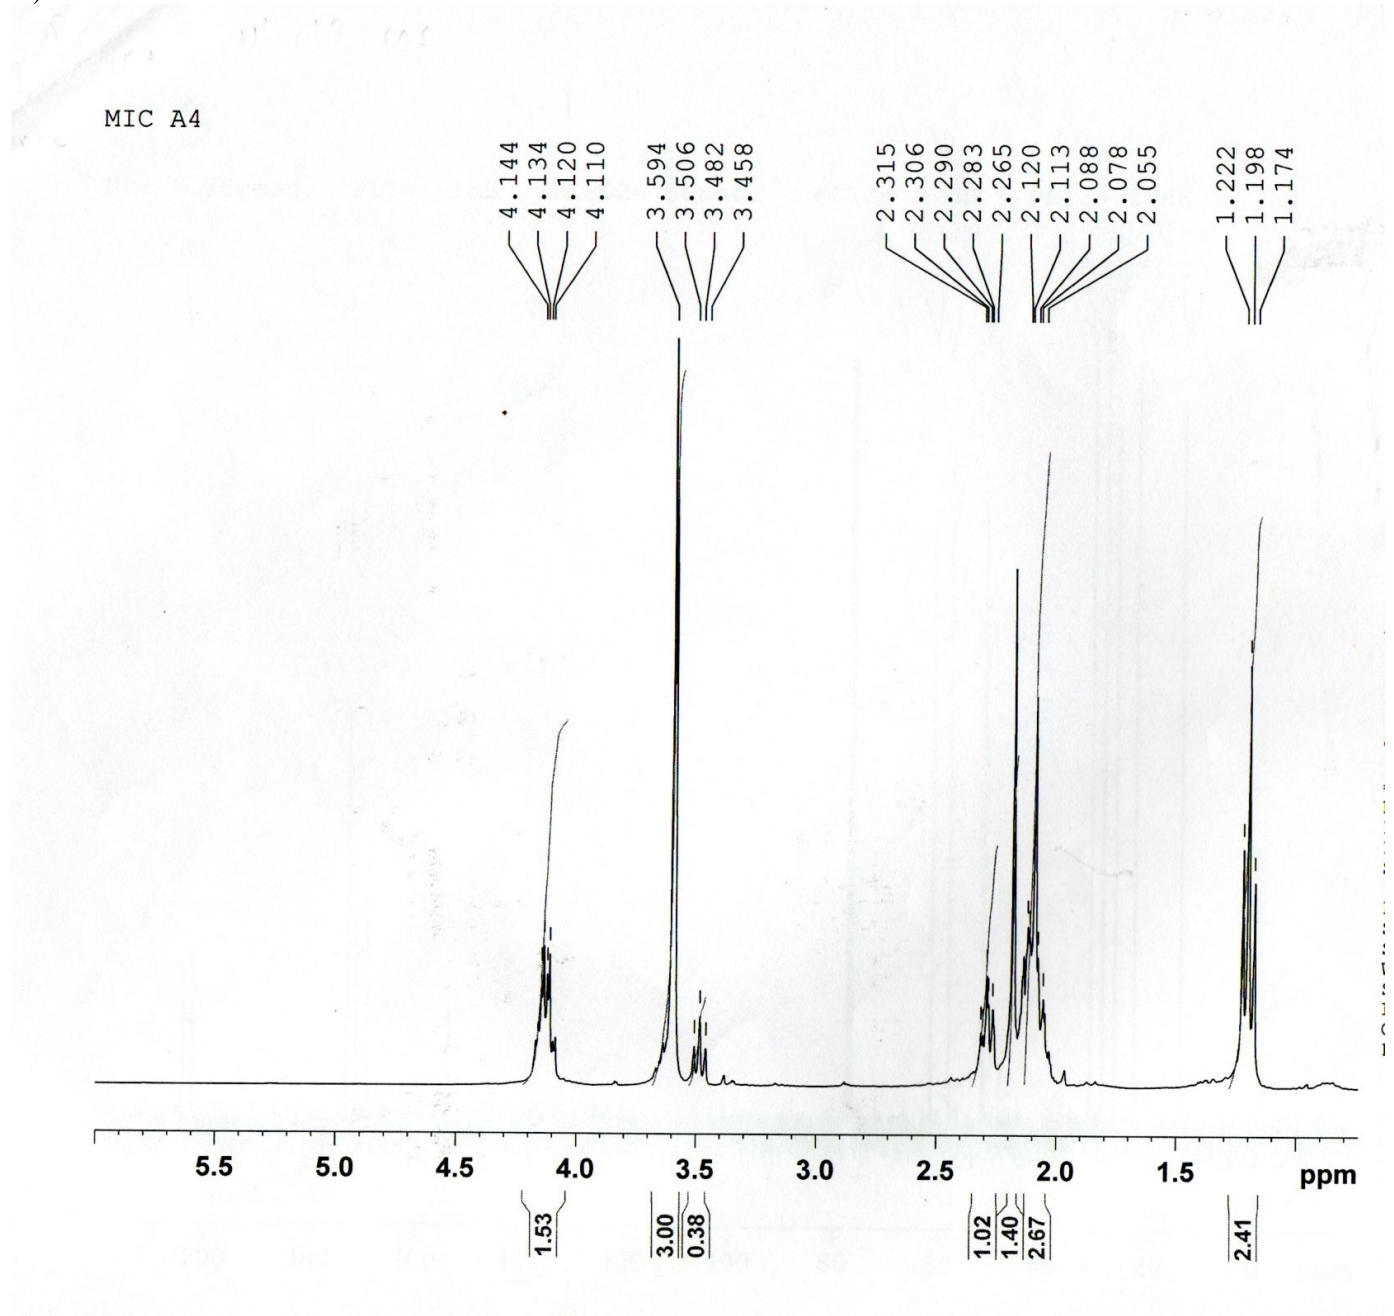

<sup>13</sup>C NMR

P1= 9.25usec

PL1= -1dB

PCPD2= 80usec

PL12= 17dB

PL13= 17dB

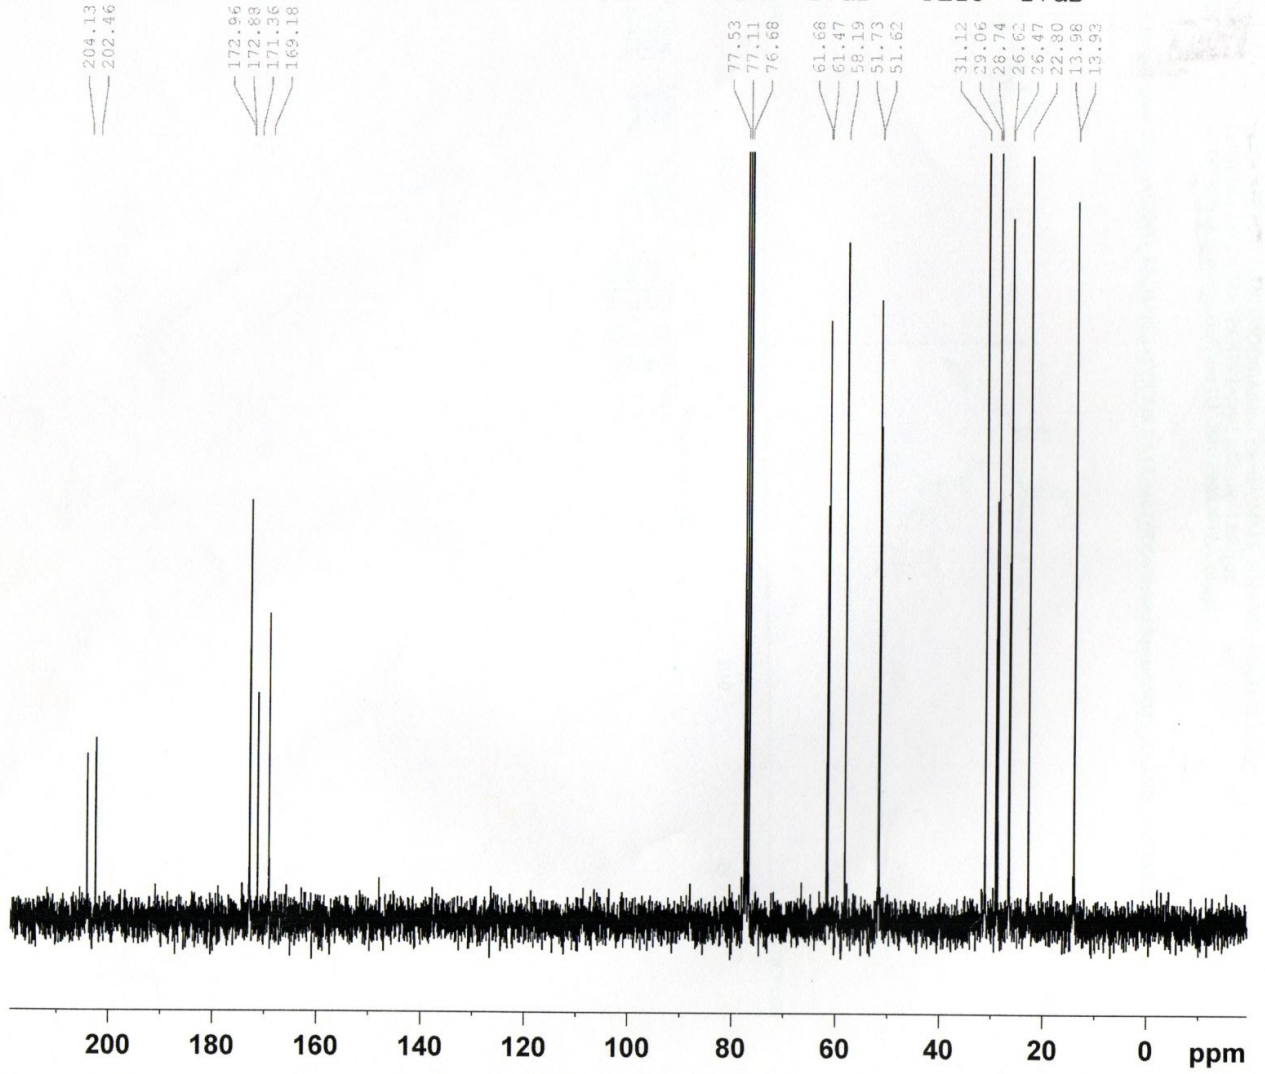

C)

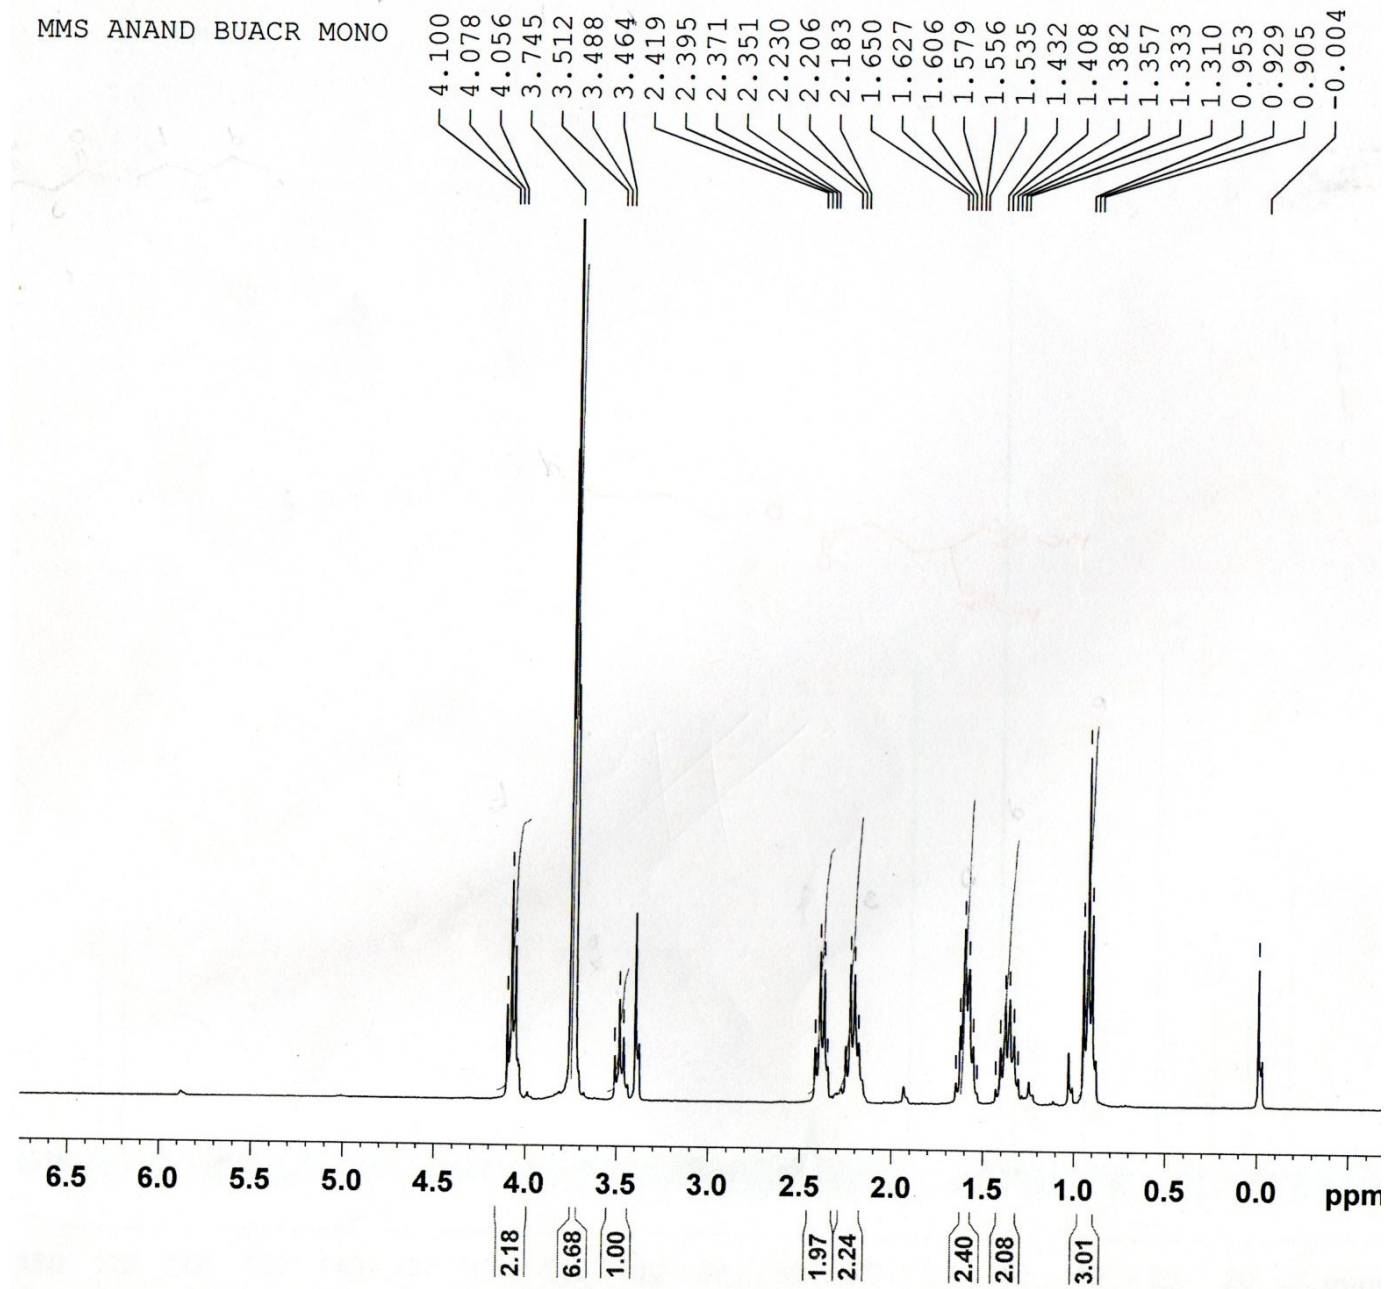

But acr OMe2

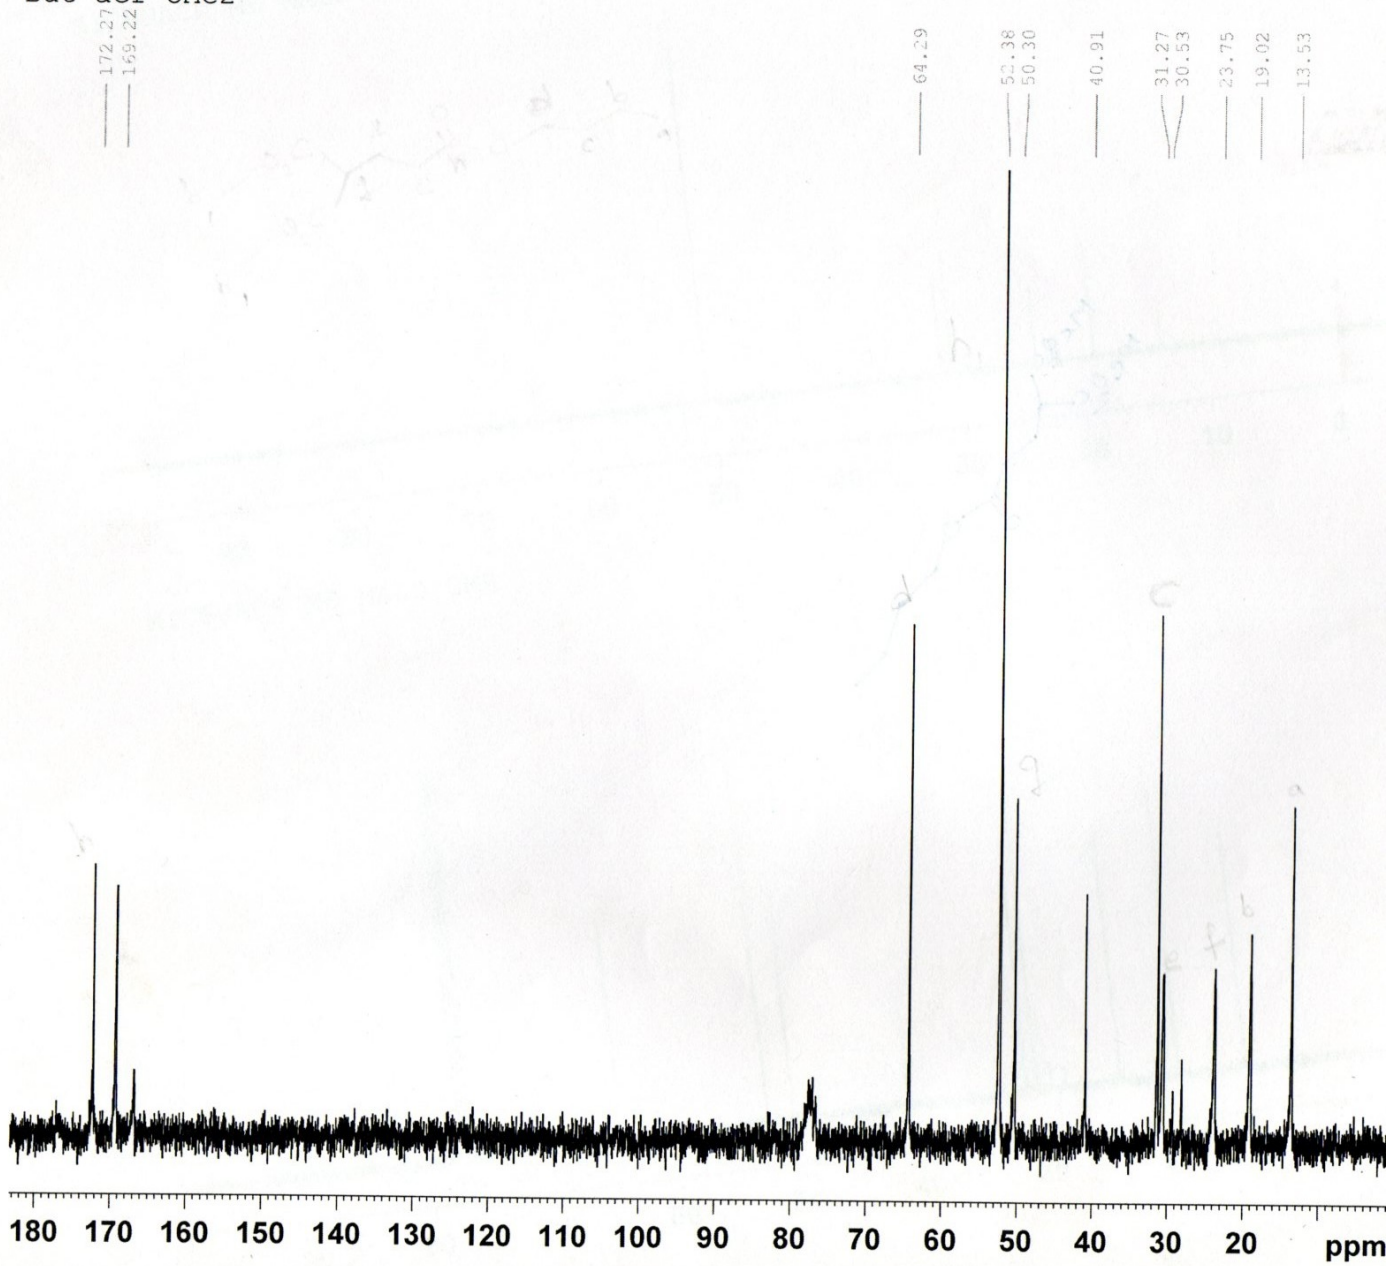



D)

MIC A2

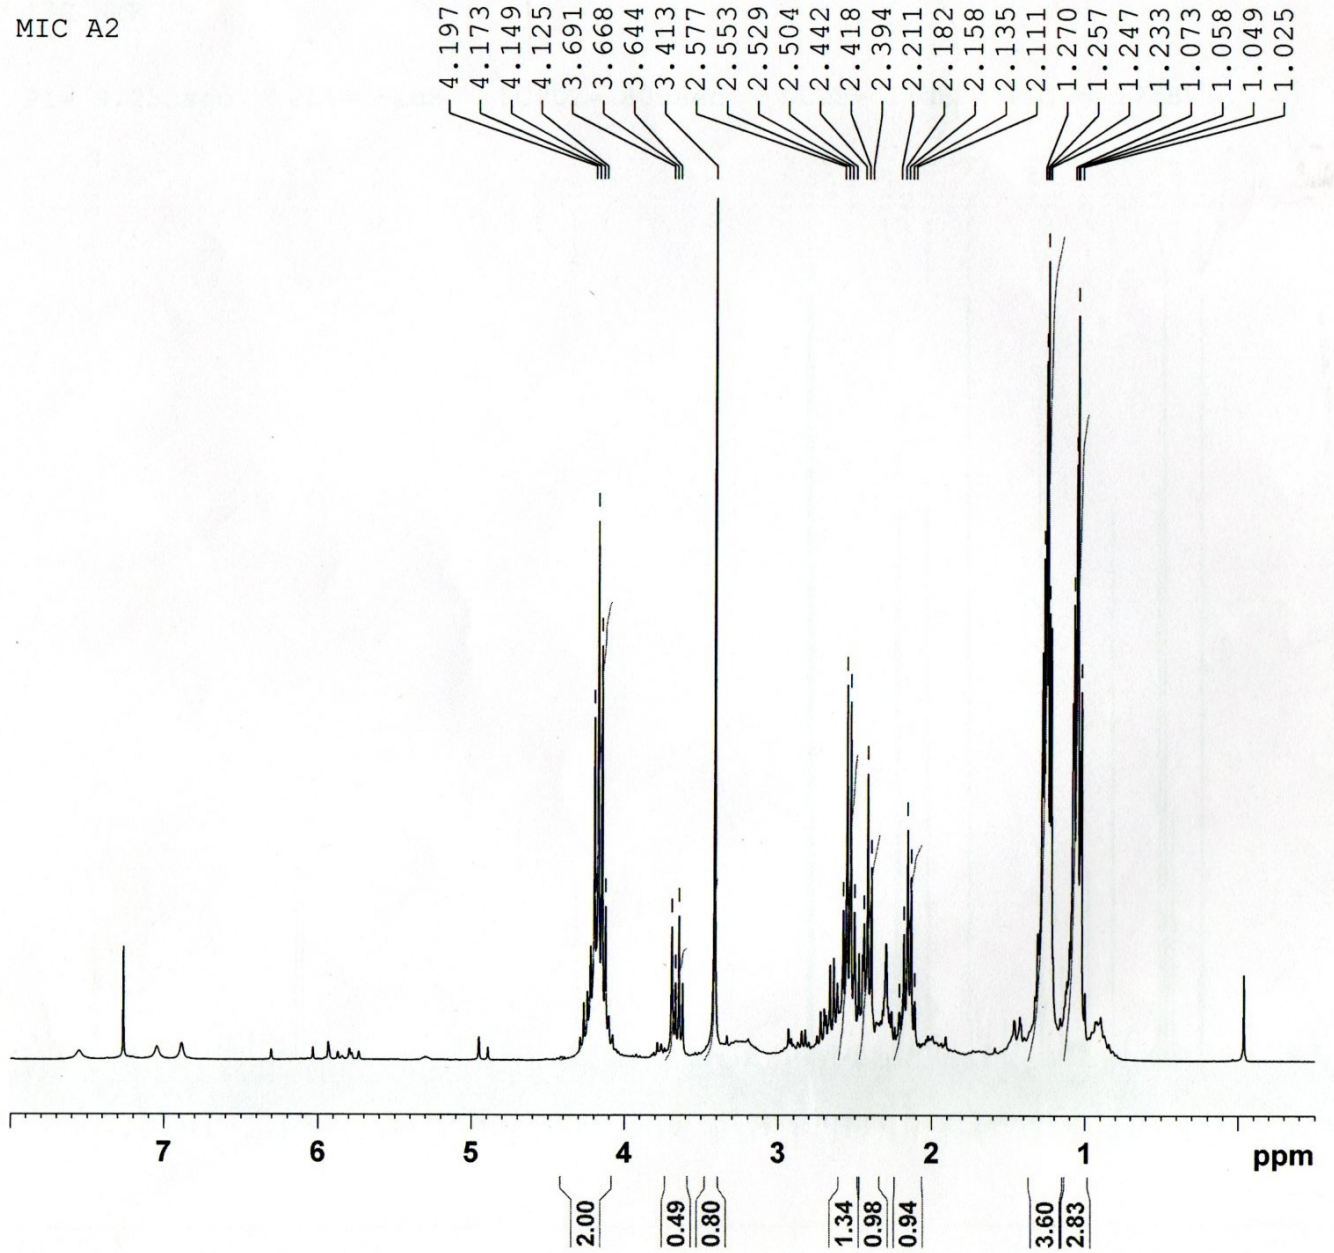

13C NMR

P1= 9.25usec

PL1= -1dB

PCPD2= 80usec

PL12= 17dB

PL13= 17dB

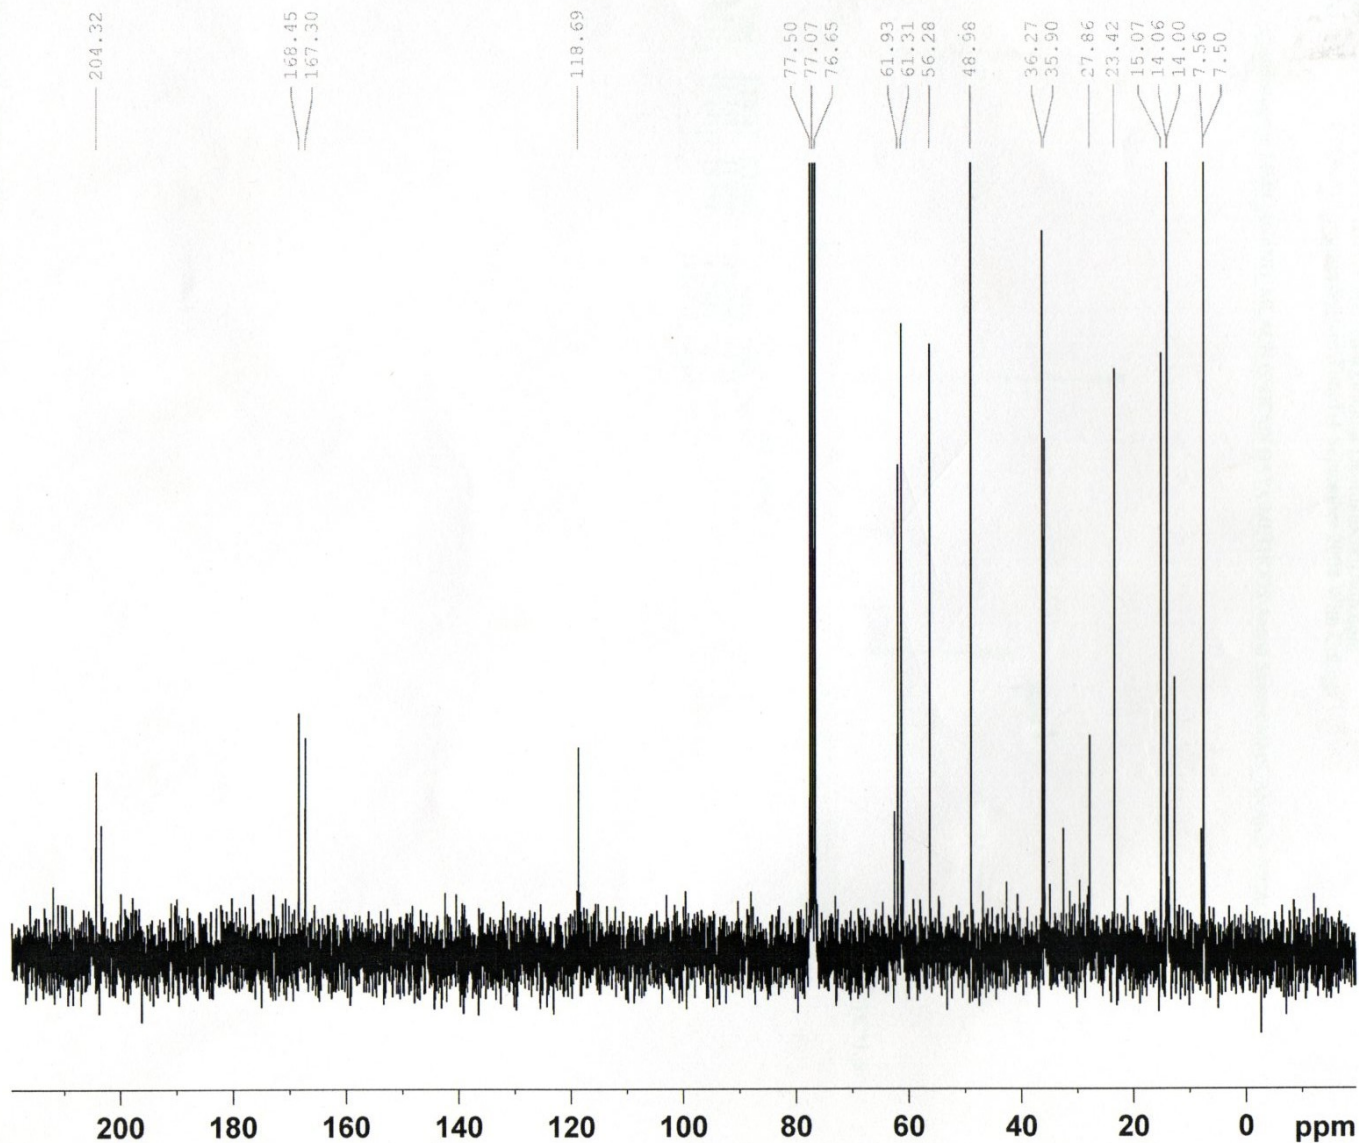

E)

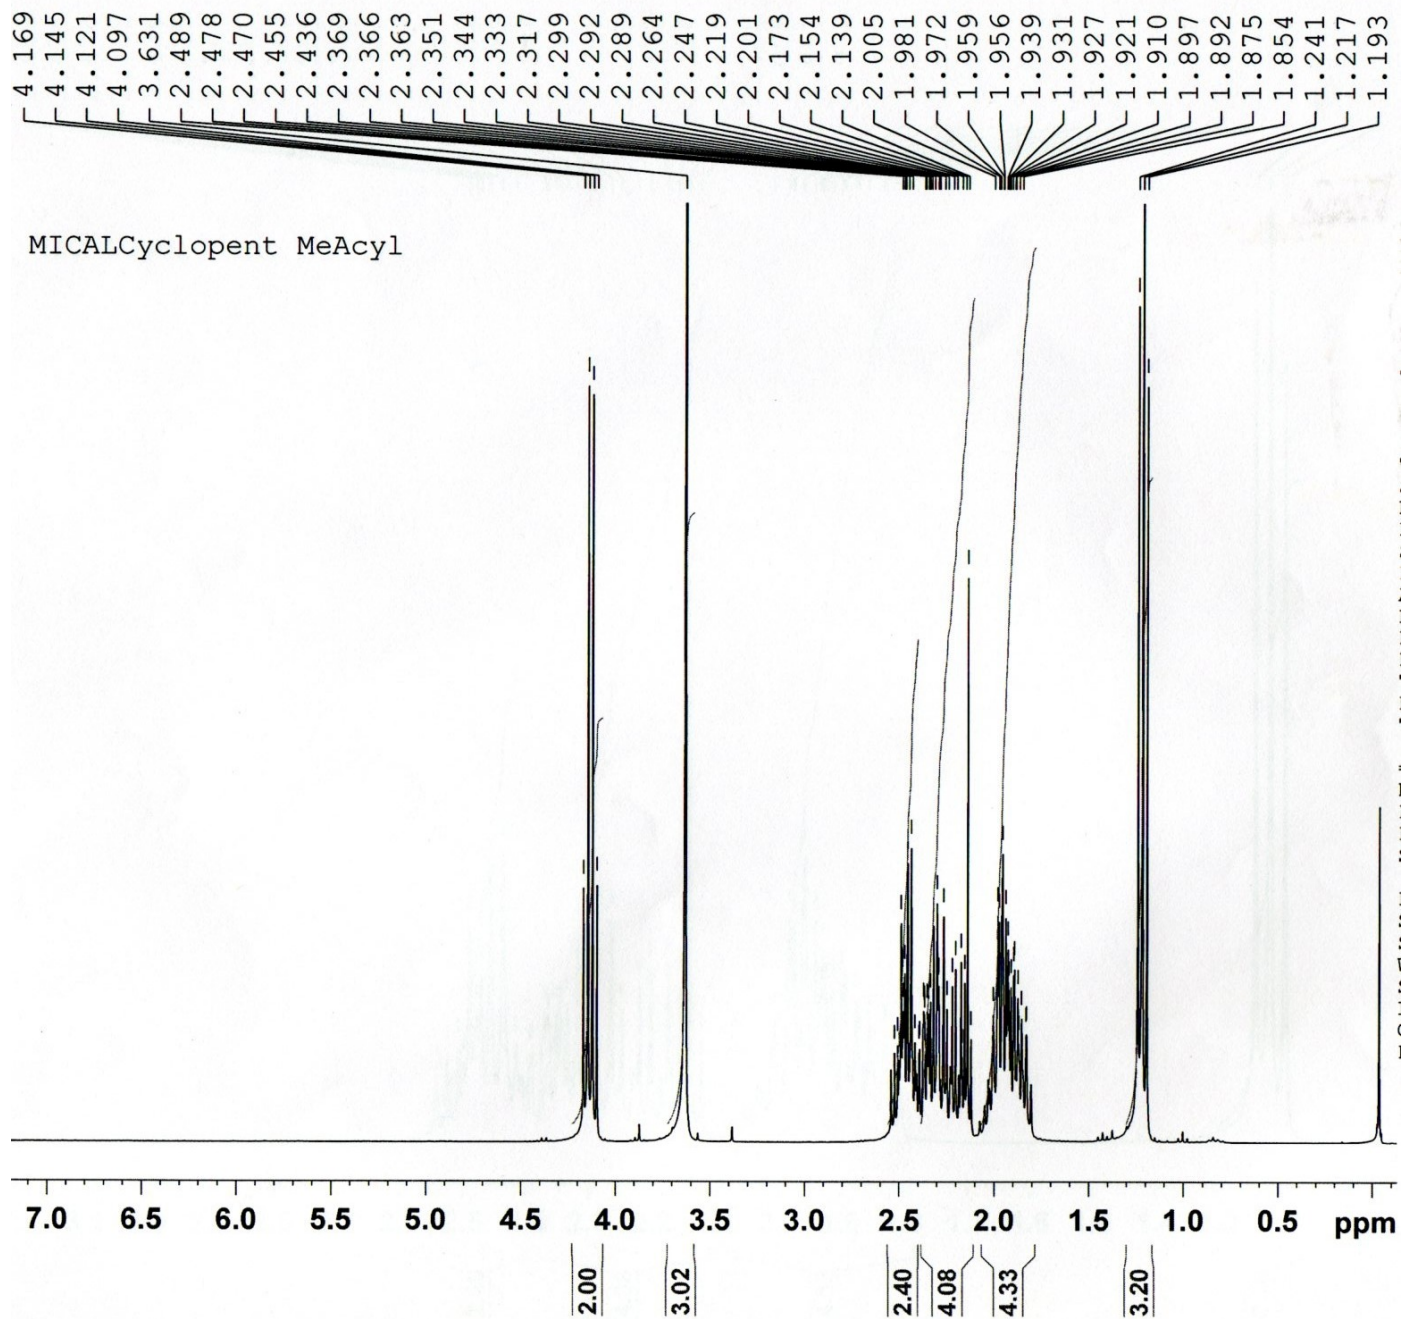

MICALCyclopent MeAcyl

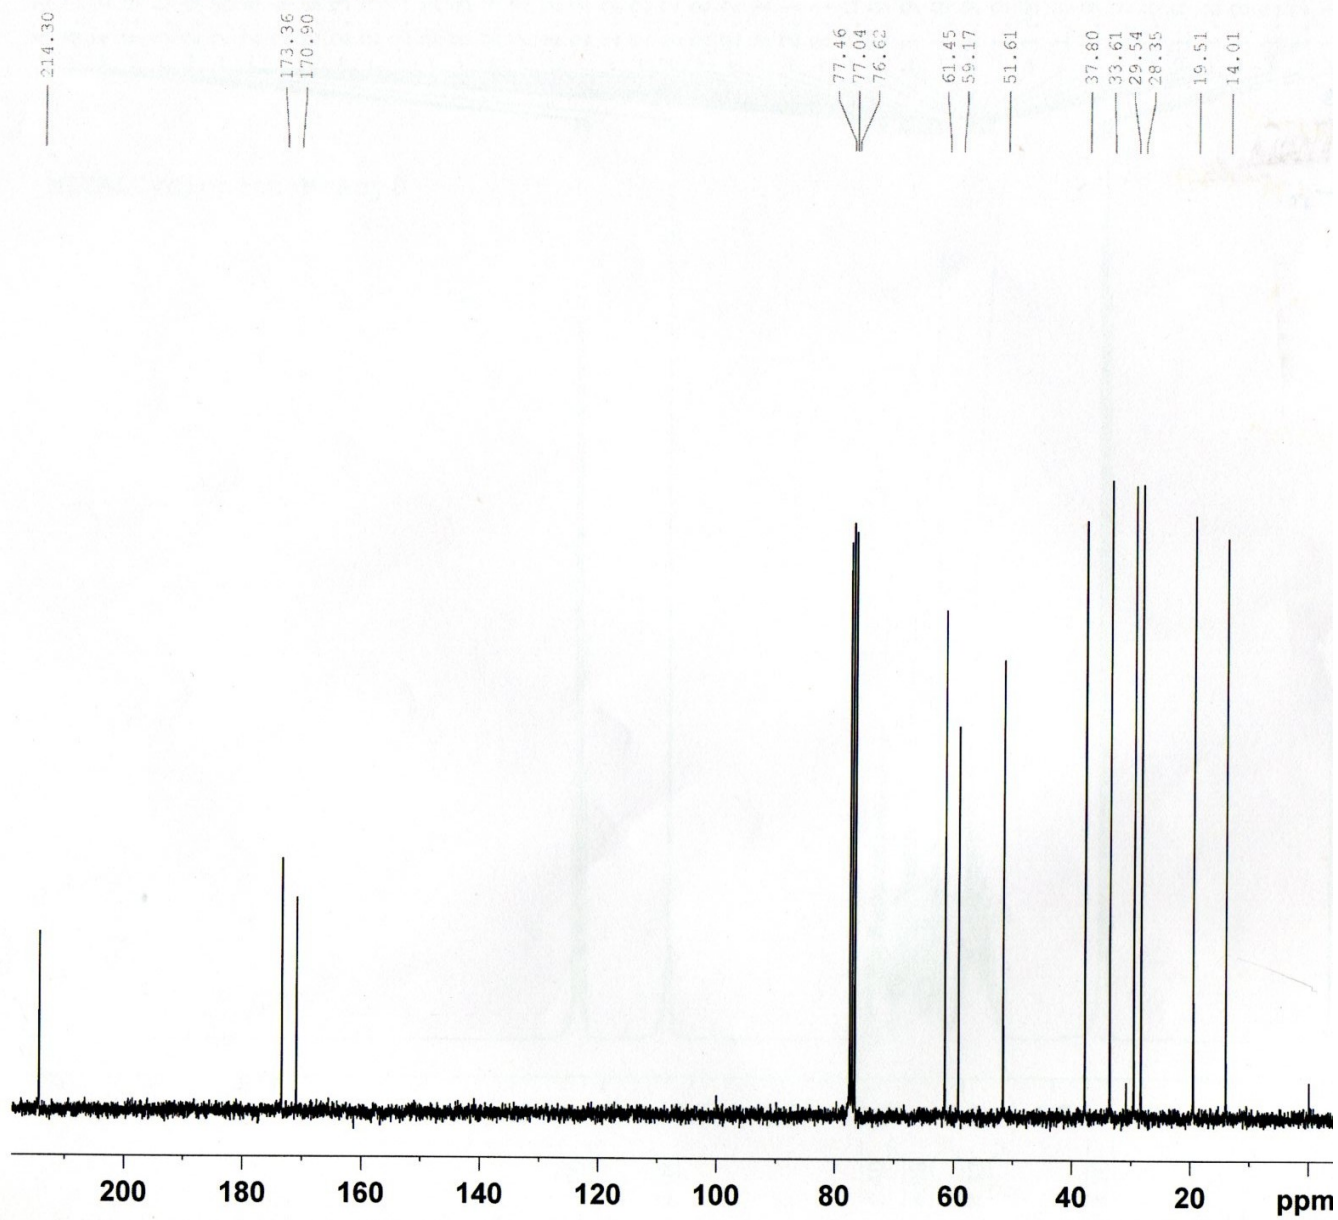

Supplement: c5nj01225b1.pdf [file c5nj01225b1.pdf]
